# Supplementary material for: Needle-like MnO2/activated carbon nanocomposites derived from human hair as versatile electrode materials for supercapacitors
Source: Royal Society of Chemistry journal article supplement (doi:10.1039/c5ra16624a), 2015-01-01
Supplement: c5ra16624a1.pdf [file c5ra16624a1.pdf]

## **Supporting Information**

### **Needle-like MnO<sub>2</sub>/activated carbon nanocomposites derived from human hair as versatile electrode materials for supercapacitors**

Dian Deng,<sup>1</sup> Byoung-Suhk Kim,<sup>2</sup> Mayakrishnan Gopiraman,<sup>1,\*</sup> Ick Soo Kim<sup>1,\*</sup>

<sup>1</sup>Nano Fusion Technology Research Lab, Interdisciplinary Cluster for Cutting Edge Research (ICCER), Division of Frontier Fibers, Institute for Fiber Engineering (IFES), National University Corporation, Shinshu University, Ueda, Nagano, 386-8567, Japan

<sup>2</sup>Department of Organic Materials & Fiber Engineering, Chonbuk National University, 567 Baekje-daero, Deokjin-gu, Jeonju-si, Jeollabuk-do 561-756, Republic of Korea

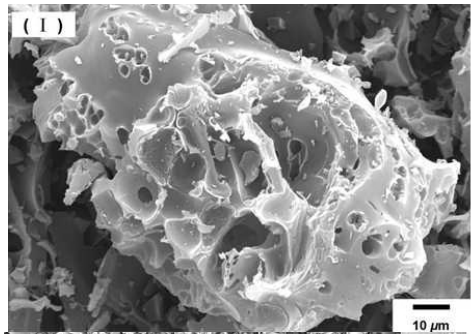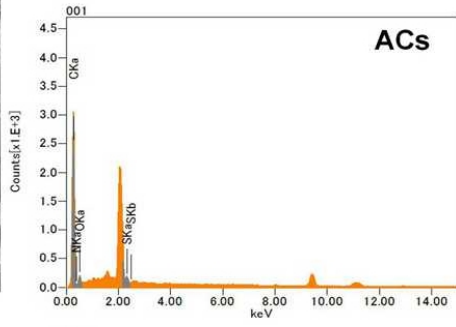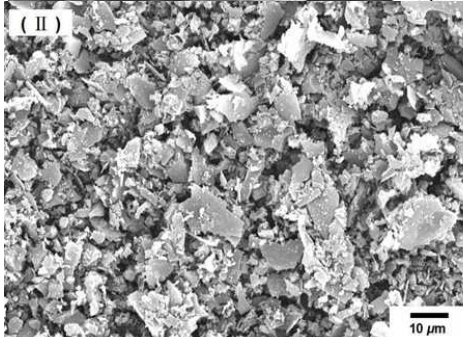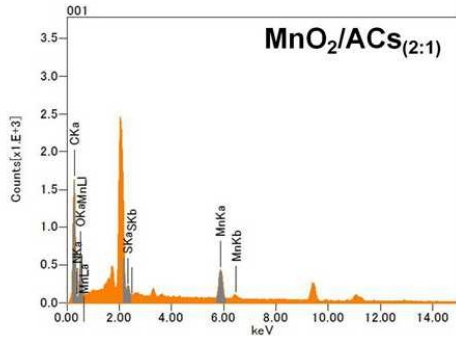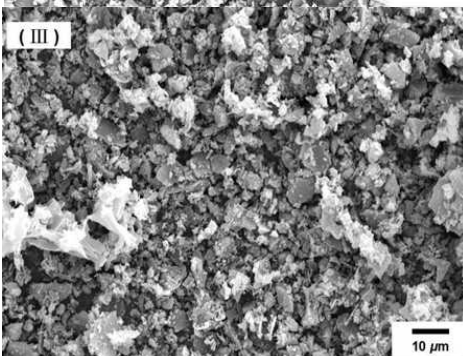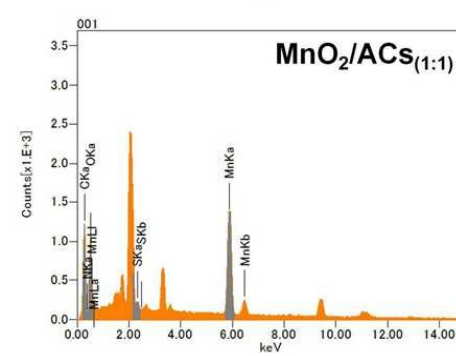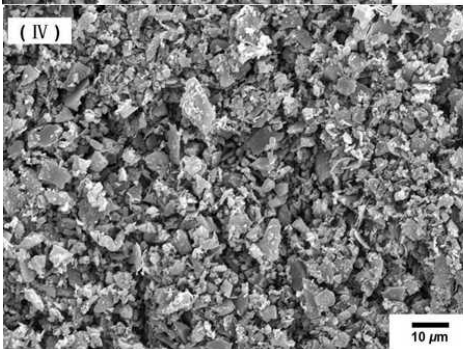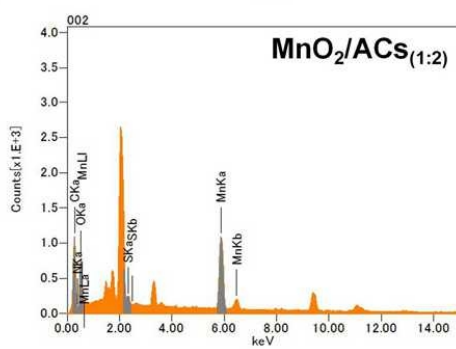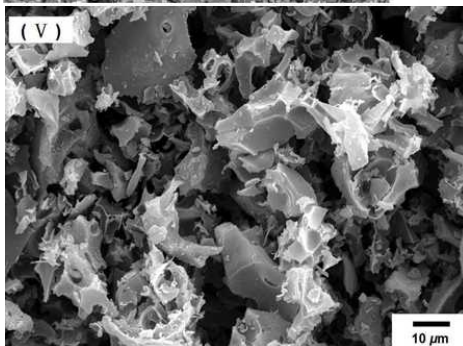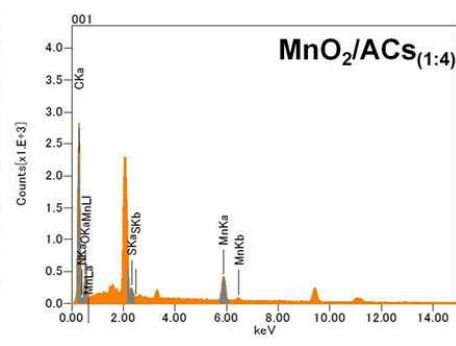

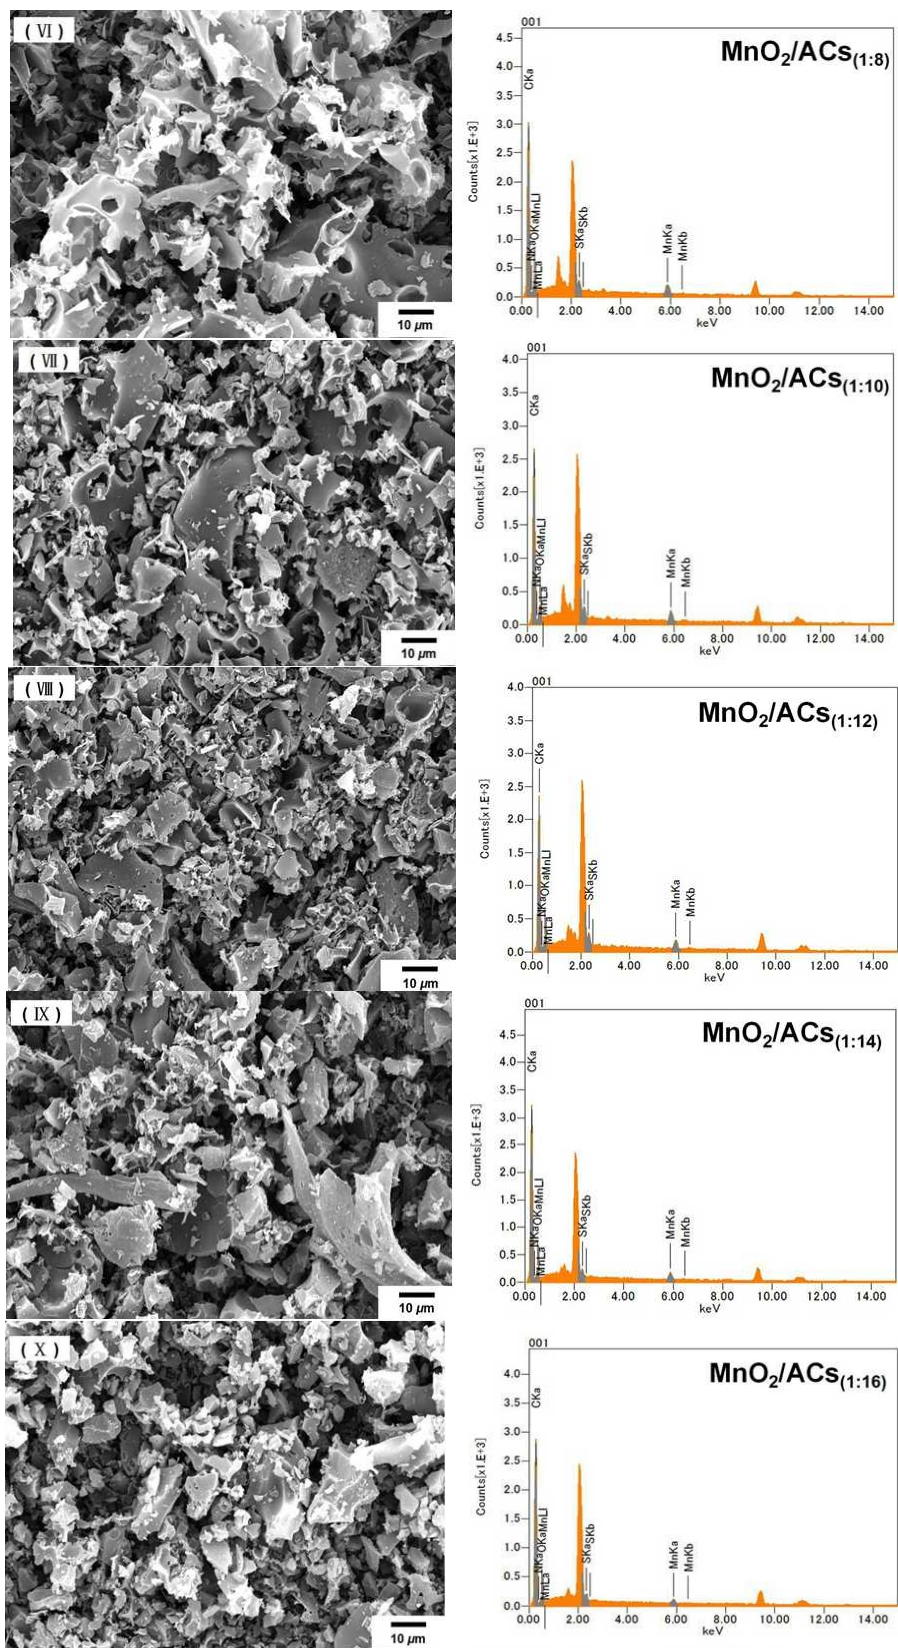

Fig. S1 SEM images and corresponding EDS spectrum of ACs and MnO<sub>2</sub>/ACs<sub>(x:y)</sub>.

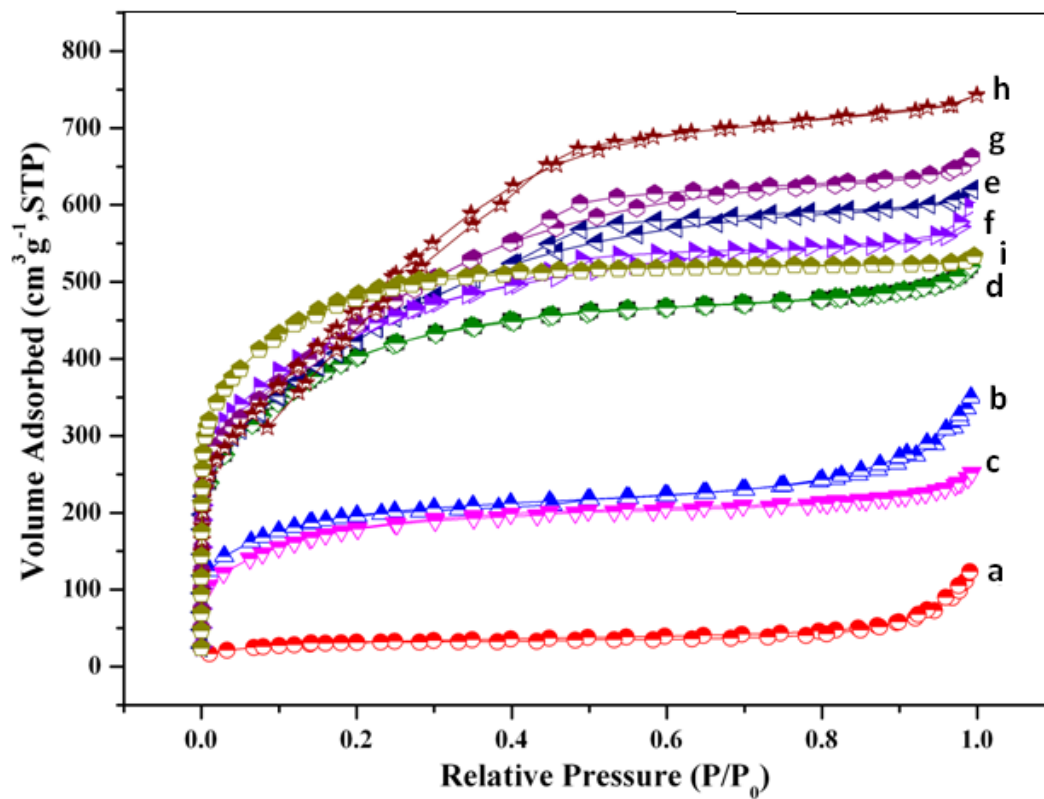

**Fig. S2** Nitrogen adsorption–desorption isotherms of (a) MnO<sub>2</sub>/ACs<sub>(1:2)</sub>, (b) MnO<sub>2</sub>/ACs<sub>(1:1)</sub>, (c) MnO<sub>2</sub>/ACs<sub>(1:2)</sub>, (d) MnO<sub>2</sub>/ACs<sub>(1:4)</sub>, (e) MnO<sub>2</sub>/ACs<sub>(1:8)</sub>, (f) MnO<sub>2</sub>/ACs<sub>(1:10)</sub>, (g) **MnO<sub>2</sub>/ACs<sub>(1:12)</sub>**, (h) MnO<sub>2</sub>/ACs<sub>(1:14)</sub>, and (i) MnO<sub>2</sub>/ACs<sub>(1:16)</sub>.

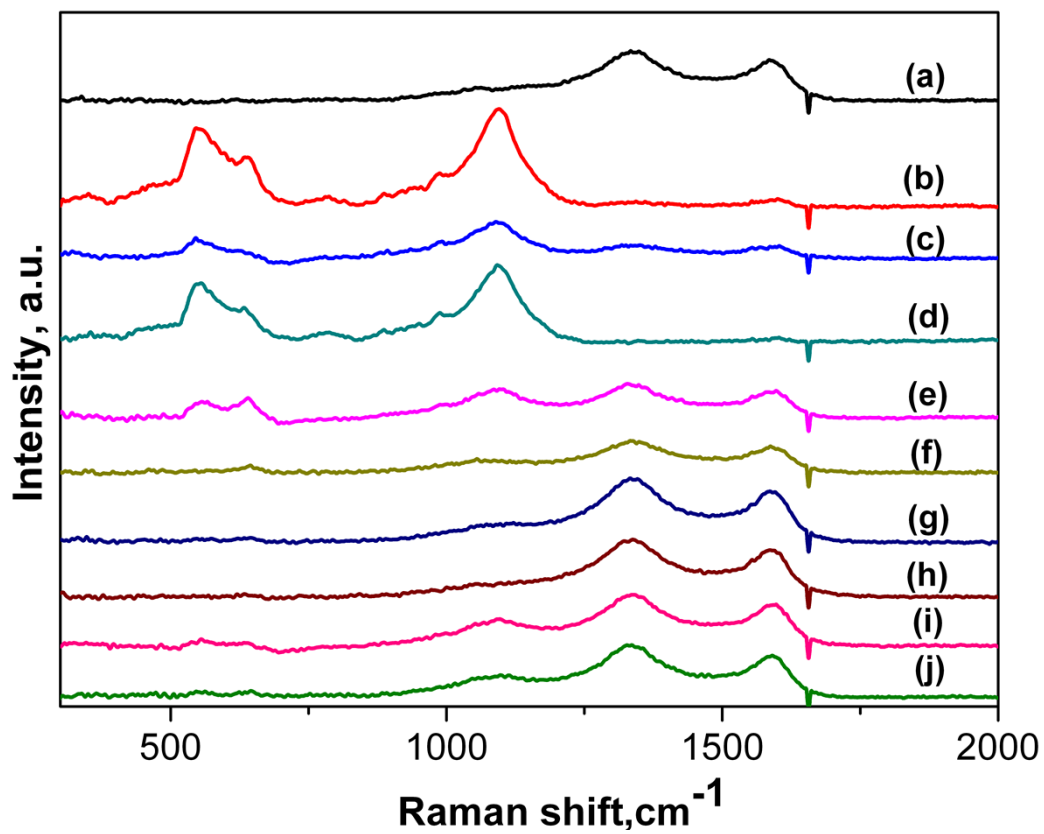

**Fig. S3** Raman spectra of (a) pure ACs, (b) MnO<sub>2</sub>/ACs<sub>(1:2)</sub>, (c) MnO<sub>2</sub>/ACs<sub>(1:1)</sub>, (d) MnO<sub>2</sub>/ACs<sub>(1:2)</sub>, (e) MnO<sub>2</sub>/ACs<sub>(1:4)</sub>, (f) MnO<sub>2</sub>/ACs<sub>(1:8)</sub>, (g) MnO<sub>2</sub>/ACs<sub>(1:10)</sub>, (h) MnO<sub>2</sub>/ACs<sub>(1:12)</sub>, (i) MnO<sub>2</sub>/ACs<sub>(1:14)</sub>, and (j) MnO<sub>2</sub>/ACs<sub>(1:16)</sub>.

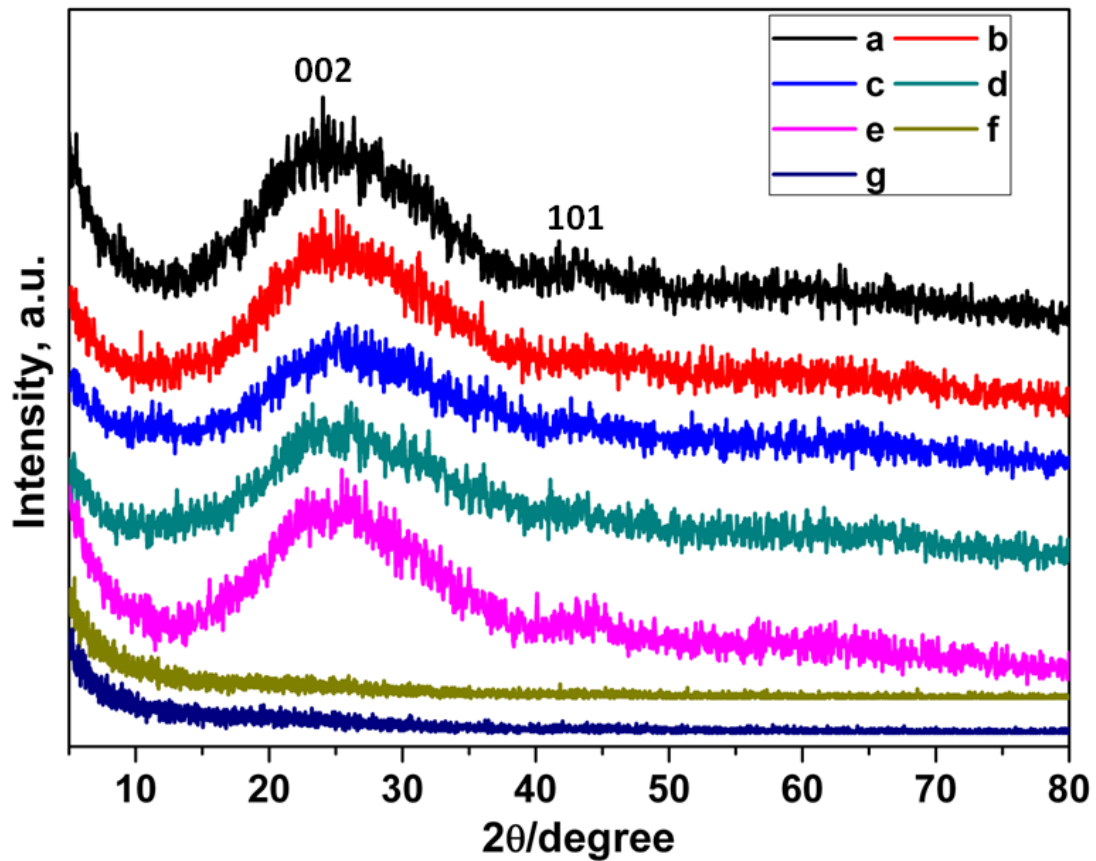

**Fig. S4** XRD patterns of (a) pure ACs, (b)  $\text{MnO}_2/\text{ACs}_{(1:2)}$ , (c)  $\text{MnO}_2/\text{ACs}_{(1:1)}$ , (d)  $\text{MnO}_2/\text{ACs}_{(1:2)}$ , (e)  $\text{MnO}_2/\text{ACs}_{(1:4)}$ , (f)  $\text{MnO}_2/\text{ACs}_{(1:8)}$ , and (g)  $\text{MnO}_2/\text{ACs}_{(1:10)}$ .
